# Supplementary material for: Development of oligonucleotide-based antagonists of Ebola virus protein 24 inhibiting its interaction with karyopherin alpha 1
Source: Royal Society of Chemistry journal article supplement (doi:10.1039/c8ob00706c), 2018-01-01
Supplement: c8ob00706c1.pdf [file c8ob00706c1.pdf]

Supplementary information

Development of oligonucleotide-based antagonists of Ebola virus protein  
24 inhibiting its interaction with karyopherin alpha 1

K. Tanaka<sup>a</sup>, Y. Kasahara<sup>a,b\*</sup>, Y. Miyamoto<sup>b</sup>, T. Okuda<sup>a</sup>, T. Kasai<sup>c</sup>,  
K. Onodera<sup>c</sup>, M. Kuwahara<sup>c,d</sup>, M. Oka<sup>b</sup>, Y. Yoneda<sup>b</sup> and S. Obika<sup>a,b</sup>

<sup>a</sup>Graduate School of Pharmaceutical Sciences, Osaka University, Osaka 565-0871,  
Japan

<sup>b</sup>National Institutes of Biomedical Innovation, Health and Nutrition (NIBIOHN), Osaka  
567-0085, Japan

<sup>c</sup>Graduate School of Science and Technology, Gunma University, Gunma 376-8515,  
Japan

<sup>d</sup>Graduate School of Integrated Basic Sciences, Nihon University, Tokyo 156-8550,  
Japan.

Table of Contents

|                                                           |    |
|-----------------------------------------------------------|----|
| Material & methods                                        | 1  |
| Table S1 Sequences of library, primers and aptamers       | 2  |
| Figure S1 Purification confirmation of recombinant eVP24. | 3  |
| Figure S2 Confirmation of specificity of VPKS-2 and -5.   | 4  |
| Figure S3 HPLC analysis of modified aptamers.             | 5  |
| Figure S4 MS analysis of 5'-FAM-VPKS-1                    | 7  |
| Figure S5 MS analysis of 5'-FAM-VPKS-2                    | 8  |
| Figure S6 MS analysis of 5'-FAM-VPKS-4                    | 9  |
| Figure S7 MS analysis of 5'-FAM-VPKS-5                    | 10 |
| Figure S8 MS analysis of 5'-FAM-VPKS-6                    | 11 |

## Material & Methods

- HPLC and MS analysis of modified aptamers

HPLC analysis was performed using ACQUITY UPLC H-Class system (Waters) with ACQUITY UPLC Oligonucleotide BEH C18 Column (1.7  $\mu\text{m}$ , 2.1 mm  $\times$  100 mm, 50  $^{\circ}\text{C}$ ) determined by 260 nm absorbance. The sample was eluted (0.5 mL/min) with buffer A (15 mM triethylamine, 400 mM hexafluoro-2-propanol prepared in water) and buffer B (15 mM triethylamine, 400 mM hexafluoro-2-propanol prepared in MeOH) with the following: 0 min 5% B, 4 min 40% B, 4.5 min 80% B, 9.5 min 80% B, 10 min 5% B, 13 min 5% B.

MS analysis was performed using Xevo G2-S QToF (Waters) (negative mode).

Table S1 Sequences of library, primers, and aptamers.

\* : Underlined T are substituted for dU<sup>ad</sup> by one primer PCR.

| Name    | Sequence                                                                        |
|---------|---------------------------------------------------------------------------------|
| T1F     | FAM-TCGCCTTGCCGGATCGCAGA(N30)TGGTCCGTGAGCCTGACACC                               |
| T2H     | HEX-GGTGTCAGGCTCACGGACCA(N30)TCTGCGATCCGGCAAGGCGA                               |
| P1F     | FAM-TCGCCTTGCCGGATCGCAGA                                                        |
| P1P     | phosphate-TCGCCTTGCCGGATCGCAGA                                                  |
| P2P     | phosphate-GGTGTCAGGCTCACGGACCA                                                  |
| P2H     | HEX-GGTGTCAGGCTCACGGACCA                                                        |
| P2H_C3  | HEX-AAAAAAAAAAAAAAAA-C3-GGTGTCAGGCTCACGGACCA                                    |
| VPNA-1  | TCGCCTTGCCGGATCGCAGAGACCCTCTGGGCATCGCCGCTTAGGACGCGTGGTCCGTGAGCCTGACACC          |
| VPNA-2  | TCGCCTTGCCGGATCGCAGAGACCCTTGTCTTTTCGGCCATCGCTAACGGTGGTCCGTGAGCCTGACACC          |
| VPNA-3  | TCGCCTTGCCGGATCGCAGAGACCCTCTTTAACATTGTCGGTGGAGGACTGGTCCGTGAGCCTGACACC           |
| VPNA-4  | TCGCCTTGCCGGATCGCAGAGACCCTTTTGGCCACAGGTGGCCCCGGCTGGTCCGTGAGCCTGACACC            |
| VPNA-5  | TCGCCTTGCCGGATCGCAGAGACCCTTCACTCAGCACCTGAAGCACACTTTGGTCCGTGAGCCTGACACC          |
| VPKS-1* | TCGCCTTGCCGGATCGCAGACACGCGAGAC <u>TCCCACIAGIGIAGTIGTIGGICCGIGAGCCIGACACC</u>    |
| VPKS-2* | TCGCCTTGCCGGATCGCAGAGACGCC <u>IACGICAAAICGACCACGICGCGIGGICCGIGAGCCIGACACC</u>   |
| VPKS-4* | TCGCCTTGCCGGATCGCAGAG <u>IAGCCIACGICAGGIGAGATCGAACACIGATGGICCGIGAGCCIGACACC</u> |
| VPKS-5* | TCGCCTTGCCGGATCGCAGAAGCG <u>IGTAAACIACGICGACGGAACACCCIGGICCGIGAGCCIGACACC</u>   |
| VPKS-6* | TCGCCTTGCCGGATCGCAGACCG <u>ICICCGAGCICCCIAATIGATGGACCAIGGICCGIGAGCCIGACACC</u>  |

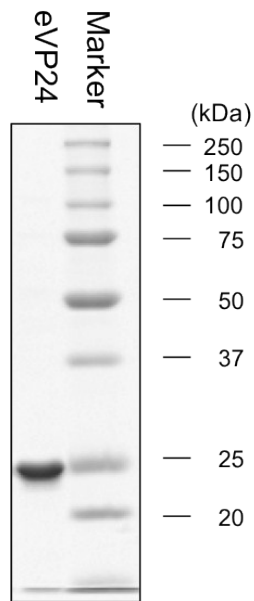

Figure S1 Purification confirmation of recombinant eVP24. Purified recombinant eVP24 was subjected to SDS-polyacrylamide gel electrophoresis (12% acrylamide). After electrophoresis, gel was stained with coomassie brilliant blue (CBB).

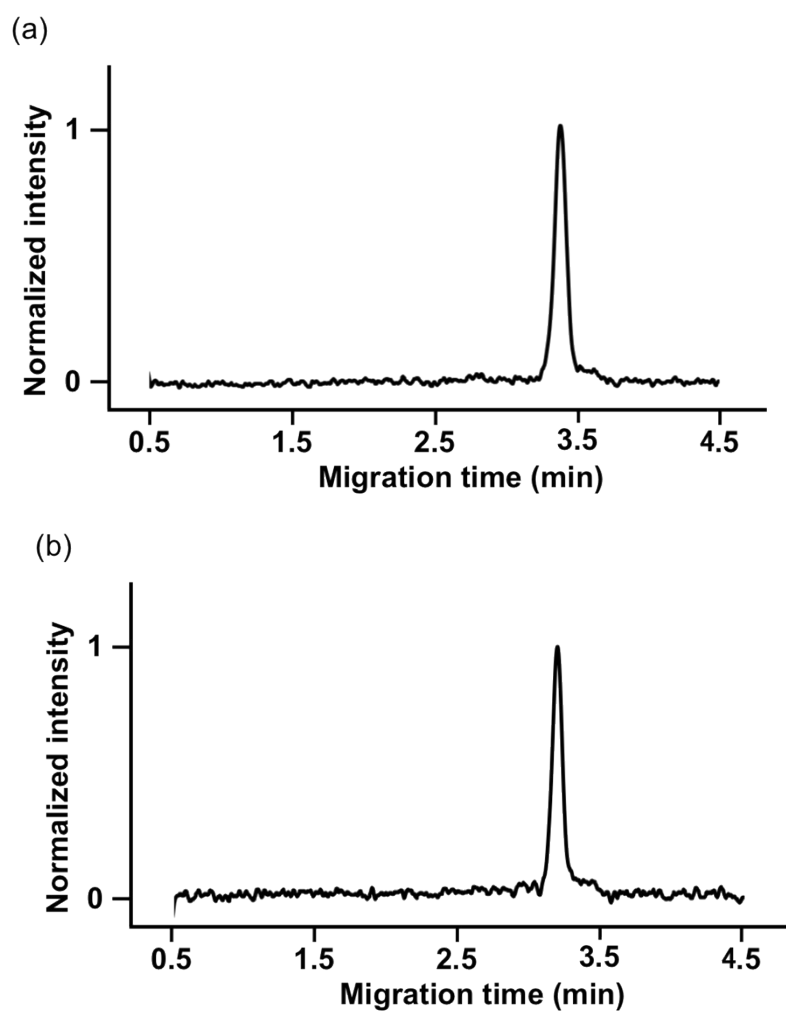

Figure S2 Confirmation of specificity of VPKS-2 and -5. The aptamers (1 nM)/FLAG-KPNA1 (4 nM) mixture was subjected to CE. (a) Electropherogram obtained for VPKS-2. (b) Electropherogram obtained for VPKS-5.

(a)

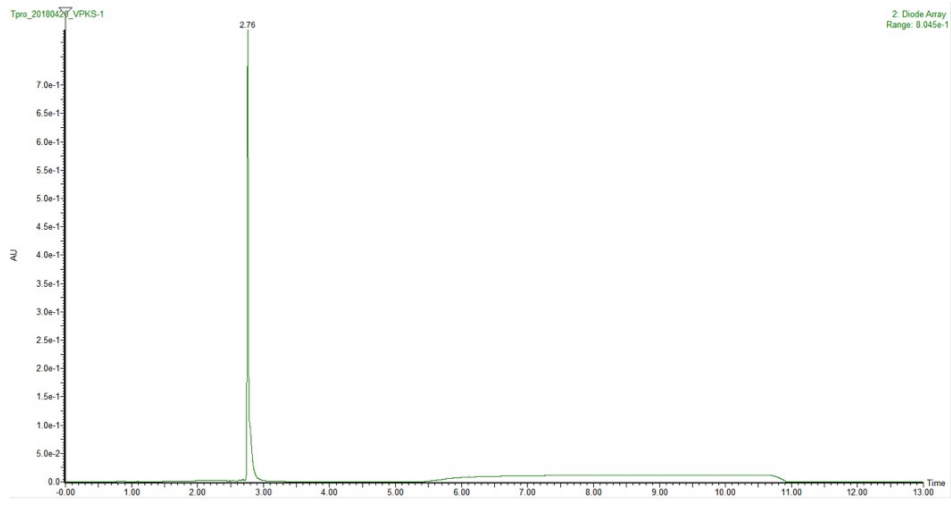

(b)

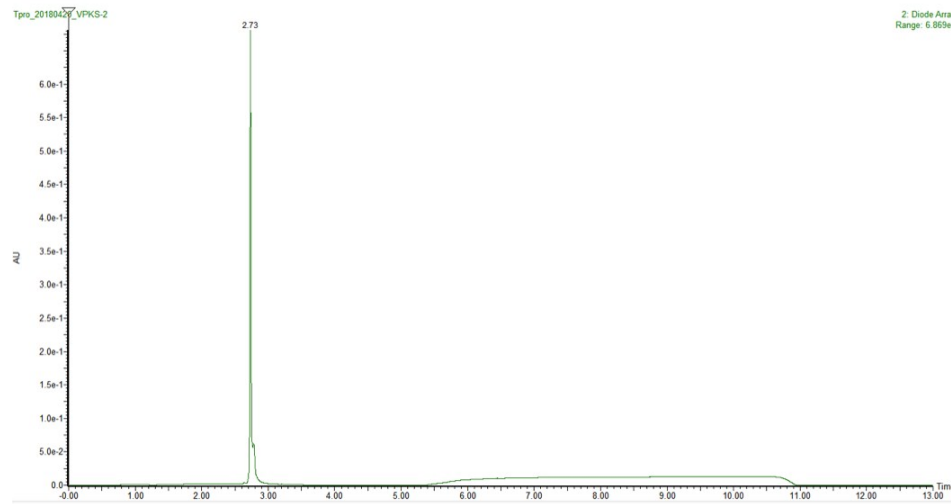

(c)

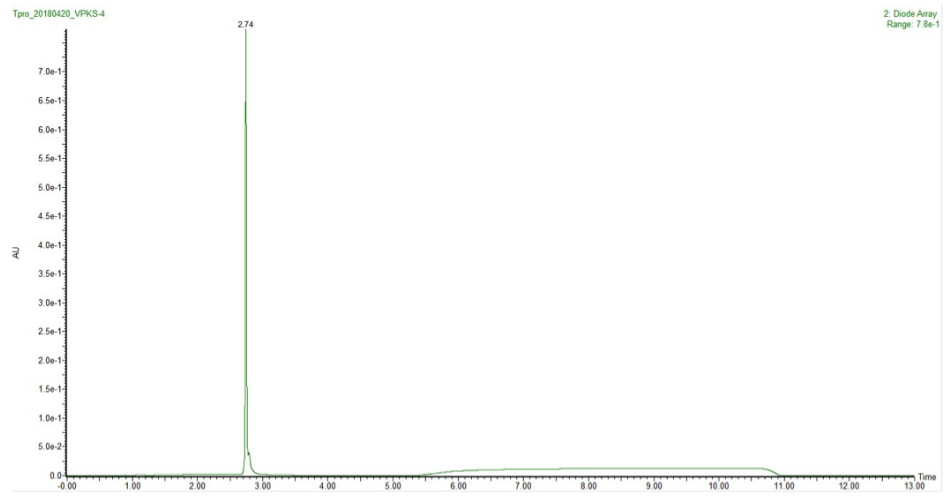

(d)

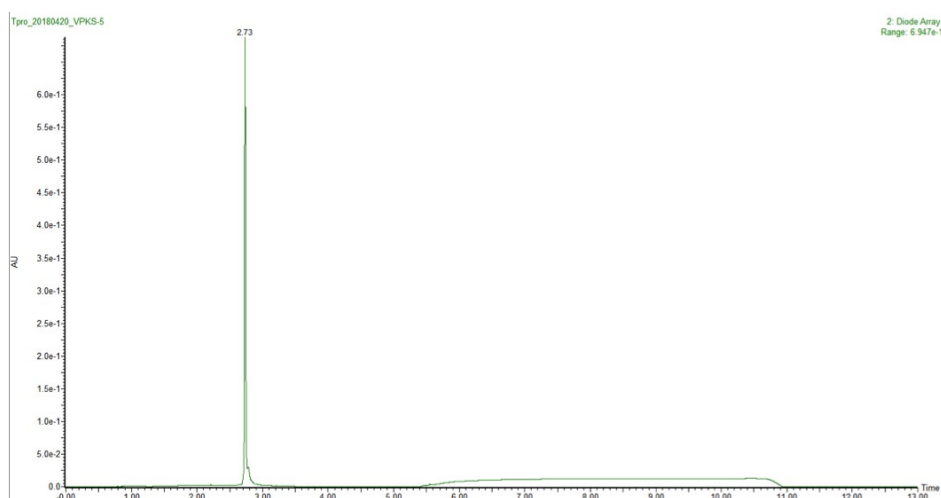

(e)

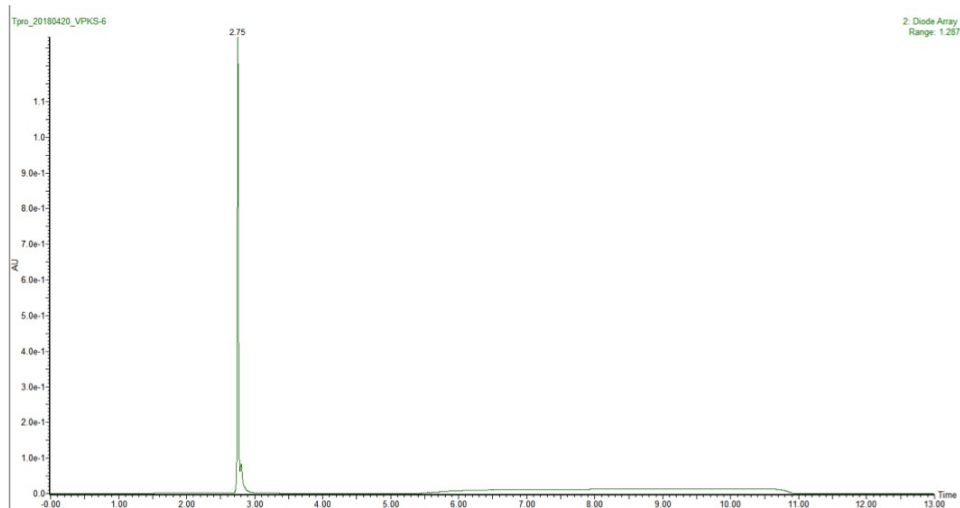

Figure S3 HPLC analysis of modified aptamers. (a) 5'-FAM-VPKS-1. Purity was estimated to be 81%. (b) 5'-FAM-VPKS-2. Purity was estimated to be 90%. (c) 5'-FAM-VPKS-4. Purity was estimated to be 94%. (d) 5'-FAM-VPKS-5. Purity was estimated to be 94%. (e) 5'-FAM-VPKS-6. Purity was estimated to be 92%.

Figure S4 MS analysis of 5'-FAM-VPKS-1

|       | [M-H] <sup>-</sup> , C <sub>1</sub> 1.19e7 | [M-H] <sup>-</sup> , Found. |
|-------|--------------------------------------------|-----------------------------|
| 70mer | 24832                                      |                             |
| 71mer | 25145                                      |                             |

Figure S5 MS ana

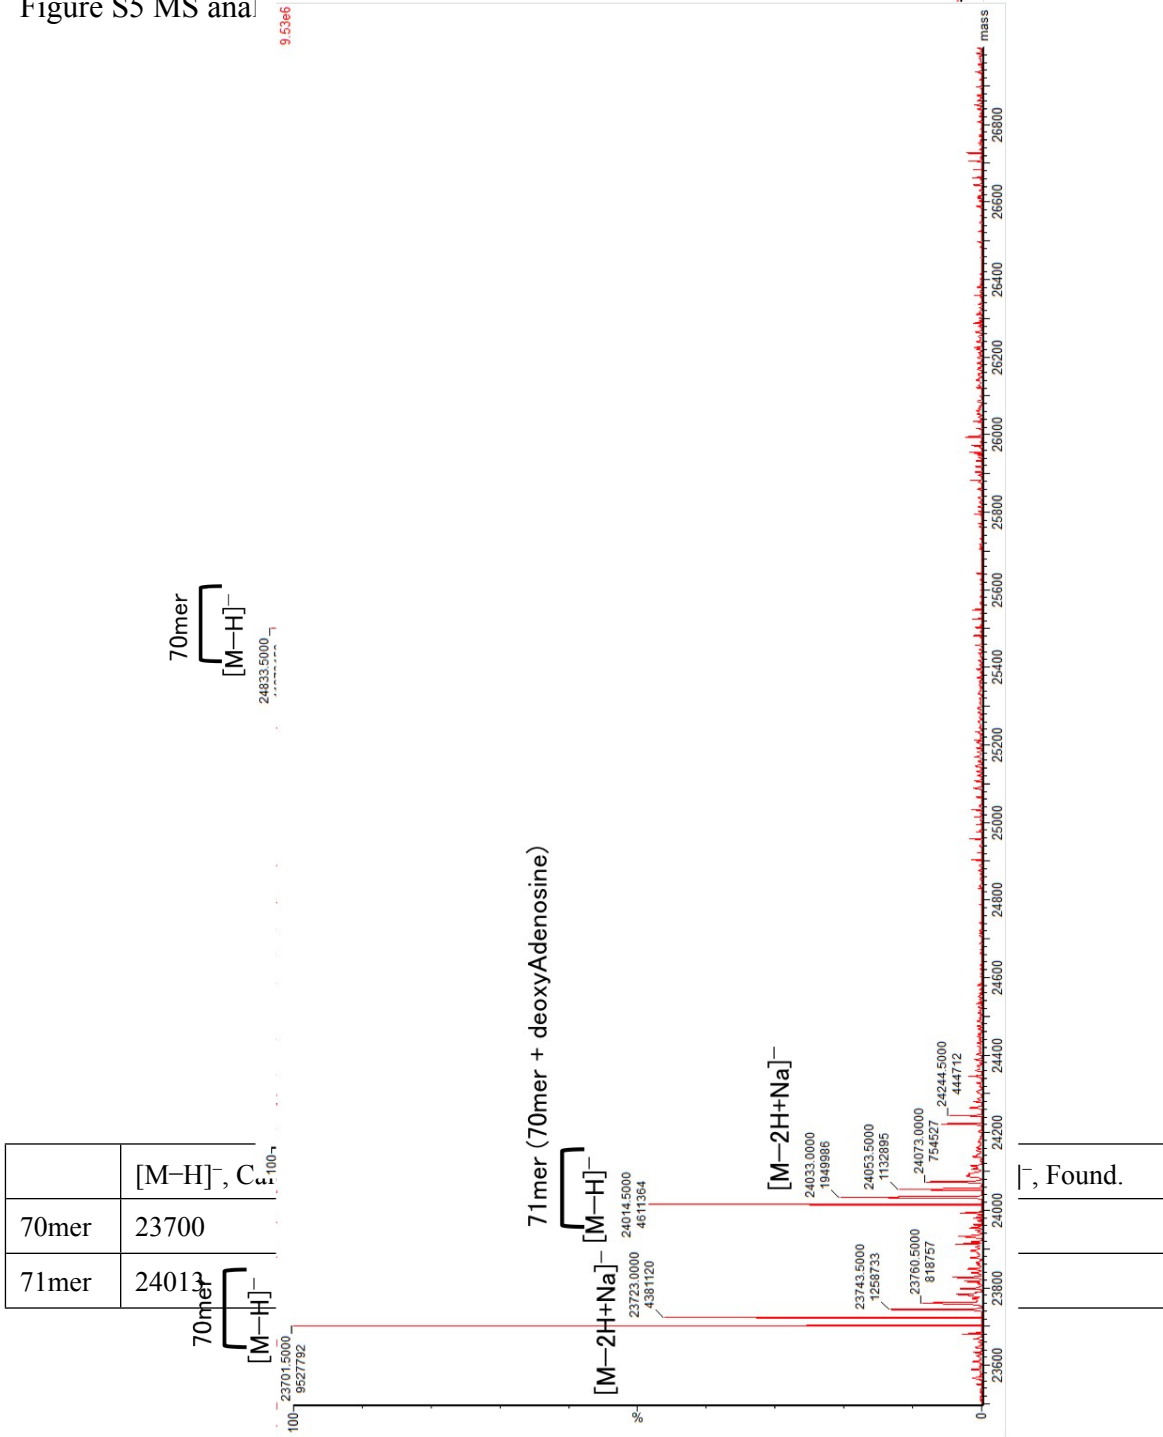



Figure S6 MS analysis of 5'-FAM-VPKS-4

|       | [M-H] <sup>-</sup> , Cal |
|-------|--------------------------|
| 70mer | 24291                    |
| 71mer | 24604                    |

| [M-H] <sup>-</sup> , Found. |
|-----------------------------|
|                             |
|                             |

Figure S7 MS analysis

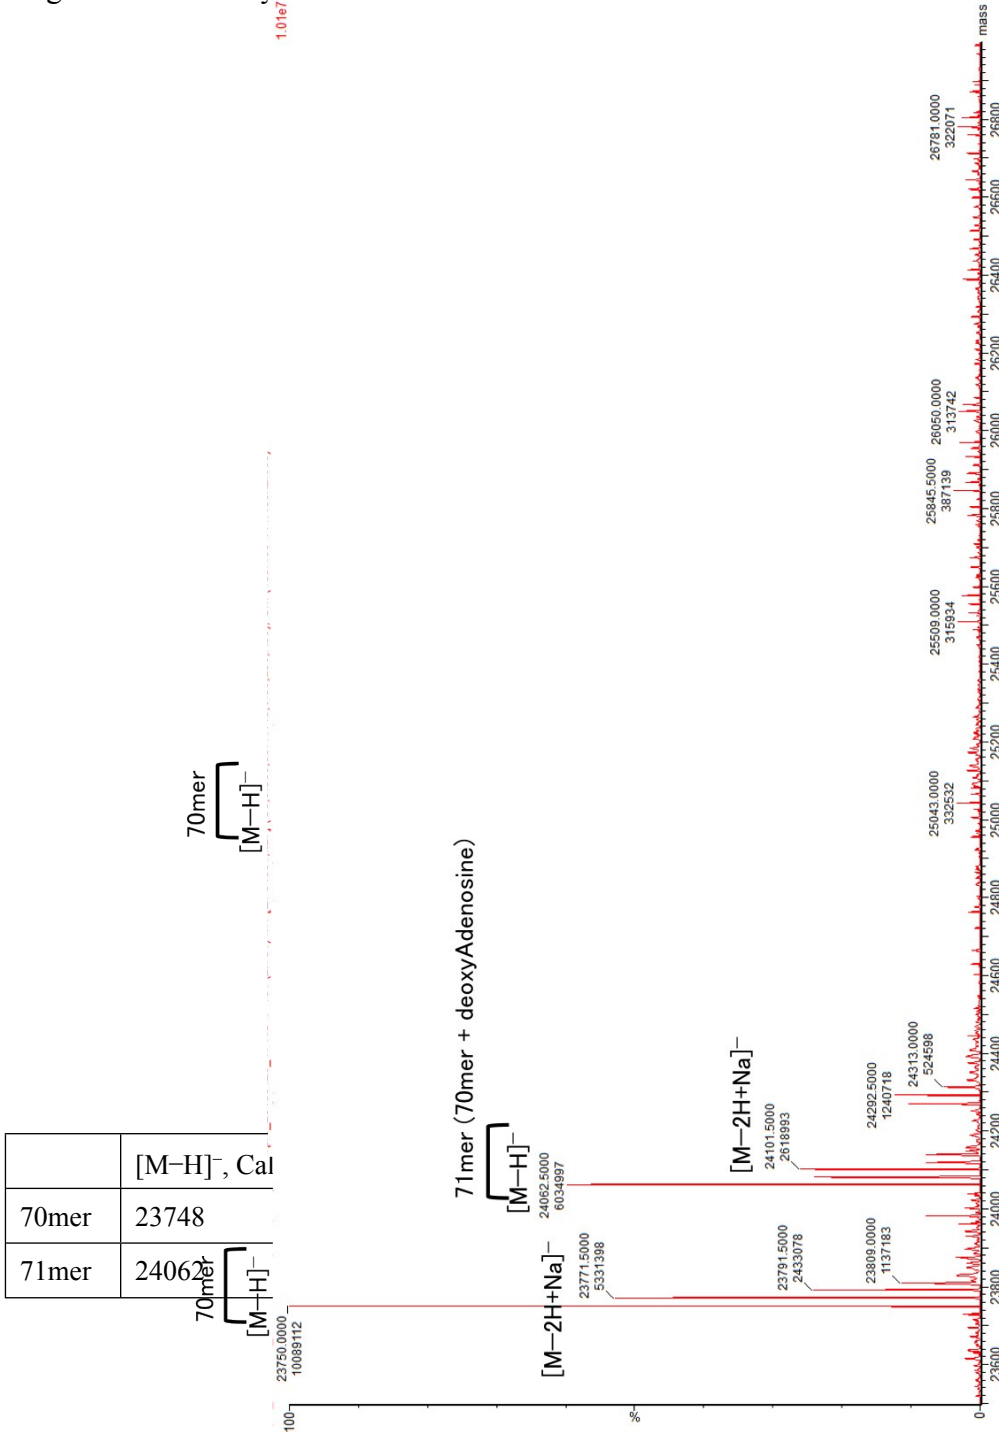

| [M-H] <sup>-</sup> , Found. |
|-----------------------------|
|                             |
|                             |

Figure S8 MS analy

|       |                         |
|-------|-------------------------|
|       | [M-H] <sup>-</sup> , Ca |
| 70mer | 24330                   |
| 71mer | 24644                   |

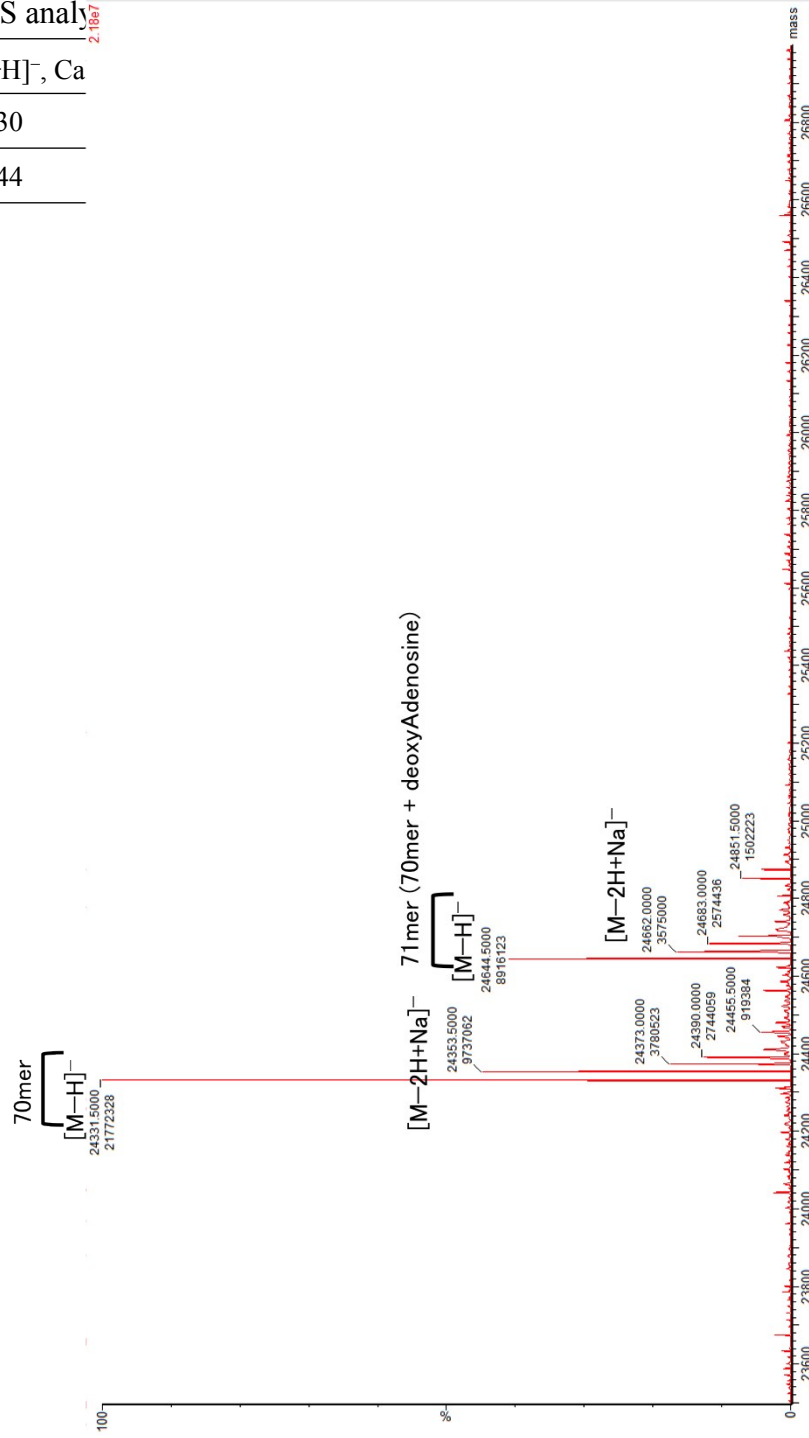

|                             |
|-----------------------------|
| [M-H] <sup>-</sup> , Found. |
|                             |
|                             |
